# Supplementary material for: Genome-wide association mapping and genomic prediction for CBSD resistance in Manihot esculenta
Source: Sci Rep. 2018 Jan 24;8:1549. doi: 10.1038/s41598-018-19696-1 (PMC5784162; doi:10.1038/s41598-018-19696-1)

# **Genome-wide association mapping and genomic prediction for CBSD resistance in *Manihot esculenta***

**Siraj Ismail Kayondo<sup>1,2\*+</sup>, Dunia Pino Del Carpio<sup>3+</sup>, Roberto Lozano<sup>3</sup>, Alfred Ozimati<sup>1,3</sup>, Marnin Wolfe<sup>3</sup>, Yona Baguma<sup>1</sup>, Vernon Gracen<sup>2,3</sup>, Samuel Offei<sup>2</sup>, Morag Ferguson<sup>5</sup>, Robert Kawuki<sup>1</sup> and Jean-Luc Jannink<sup>3,4</sup>**

<sup>1</sup> National Crop Resources Research Institute, NaCRRI, P.O. Box, 7084 Kampala, Uganda

<sup>2</sup> West Africa Center for Crop Improvement, (WACCI), University of Ghana, Ghana

<sup>3</sup> School of Integrative Plant Sciences, Section on Plant breeding and Genetics, Cornell University, Ithaca, New York, USA

<sup>4</sup> US Department of Agriculture – Agricultural Research Service (USDA-ARS), USA

<sup>5</sup> International Institute for Tropical Agriculture (IITA), Nairobi, Kenya

\*Corresponding author: [skayondo@wacci.edu.gh](mailto:skayondo@wacci.edu.gh)

+ These authors contributed equally to this work

**Supplementary Figure S1. Cassava brown streak disease symptoms on leaves and roots.** Symptom severity score ranges from 1 (no visible symptoms) to 5 (severely disease plants) on leaves **(A)** and storage roots **(B)**.

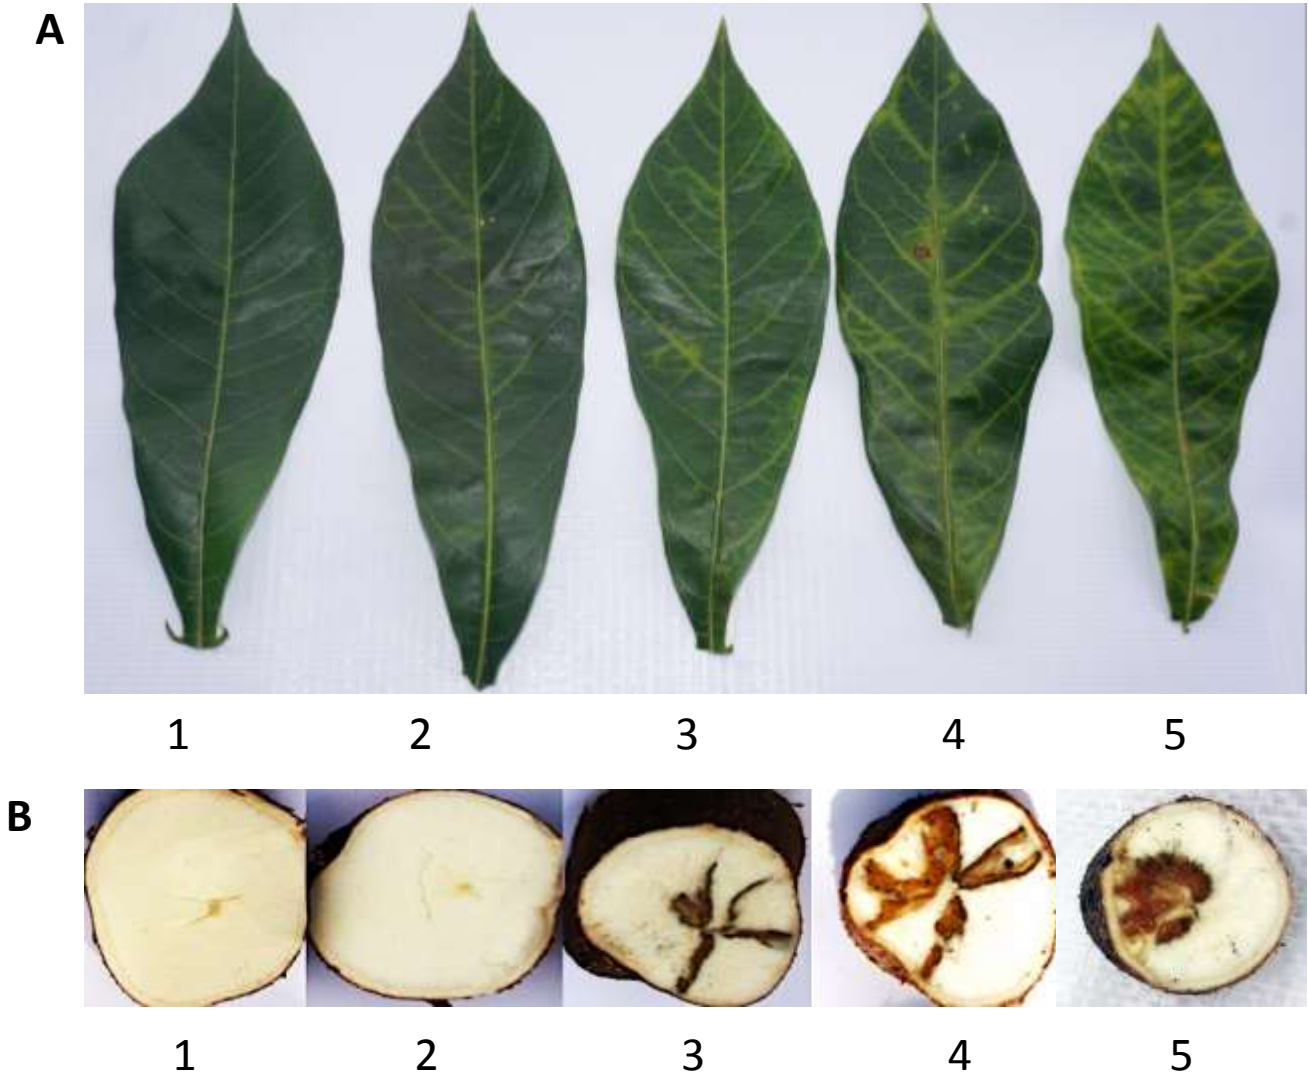

**Supplementary Figure S2. Phenotypic distribution of CBSD severity traits in Panel 1.**

(A) de-regressed BLUPs distribution of CBSD foliar severity at 3 MAP (B) de-regressed BLUPs distribution of CBSD foliar severity at 6MAP (C) de-regressed BLUPs distribution of CBSDRS 12 months root severity. MAP = months after planting. The de-regressed BLUP value is on x-axis and the number of clones is presented on the y-axis.

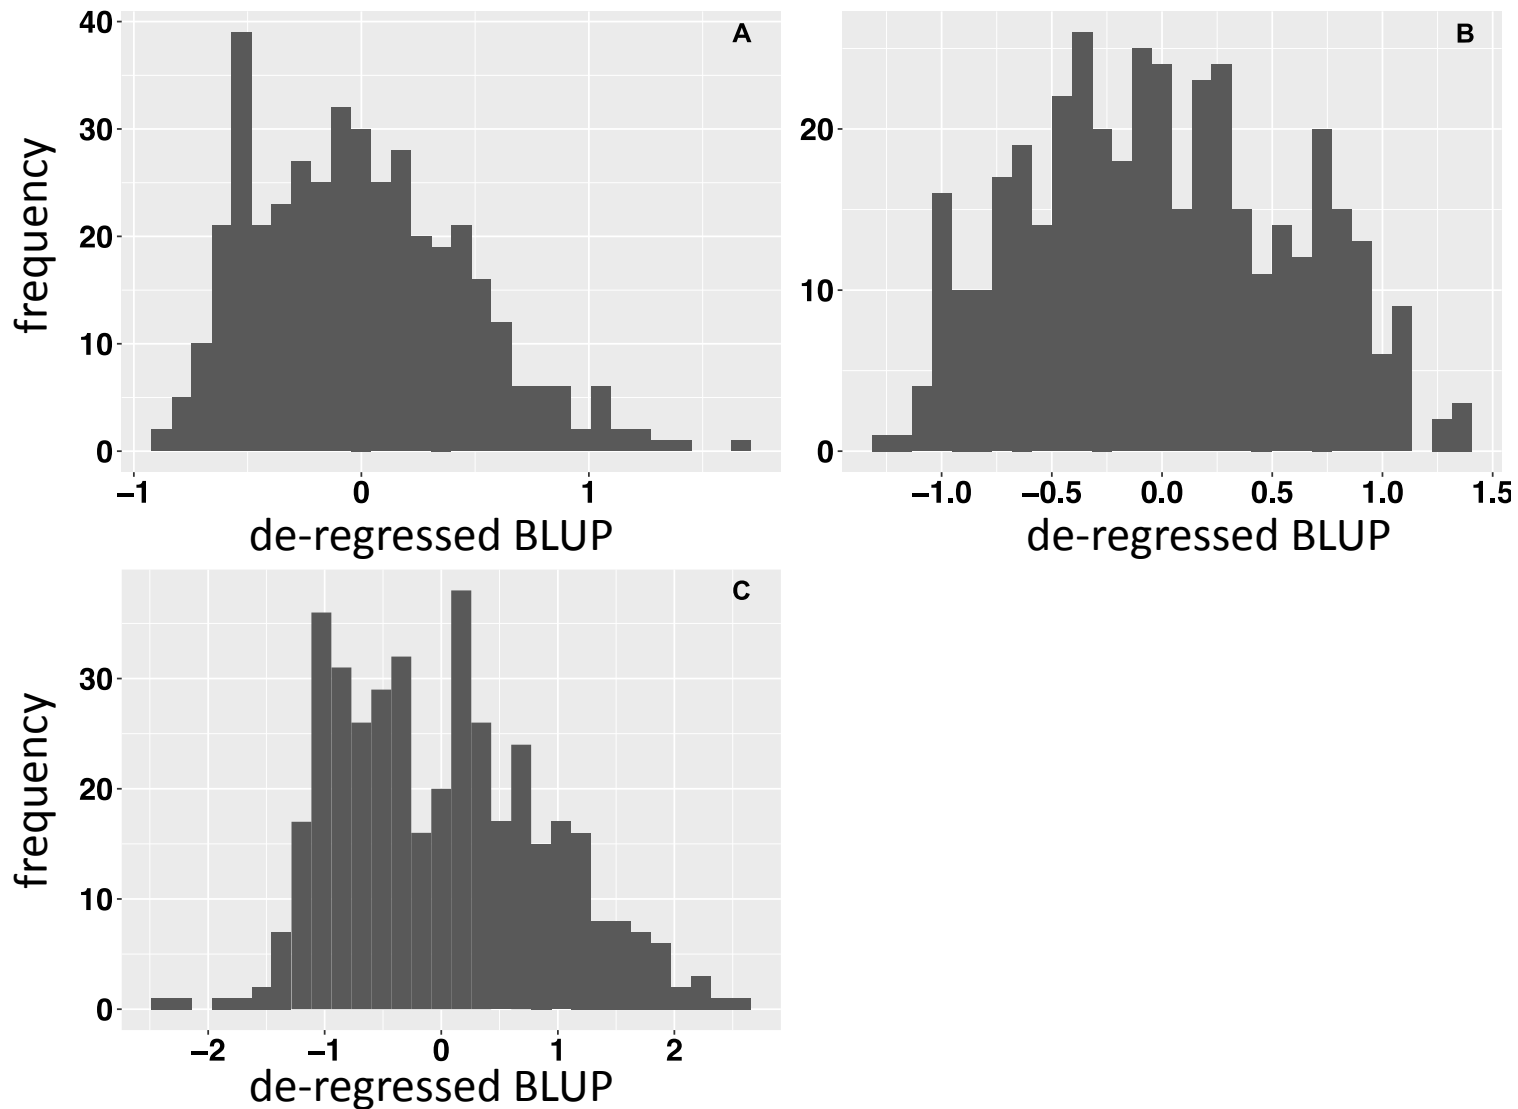

**Supplementary Figure S3. Phenotypic distribution of CBSD severity traits in Panel 2.**

(A) de-regressed BLUPs distribution of CBSD foliar severity 3 MAP (B) de-regressed BLUPs distribution of CBSD foliar severity 6MAP (C) de-regressed BLUPs distribution of CBSD foliar severity 9 MAP(D) de-regressed BLUPs distribution of CBSDRS 12 months root severity. MAP = months after planting. The de-regressed BLUP value is on x-axis and the number of clones is presented on the y-axis.

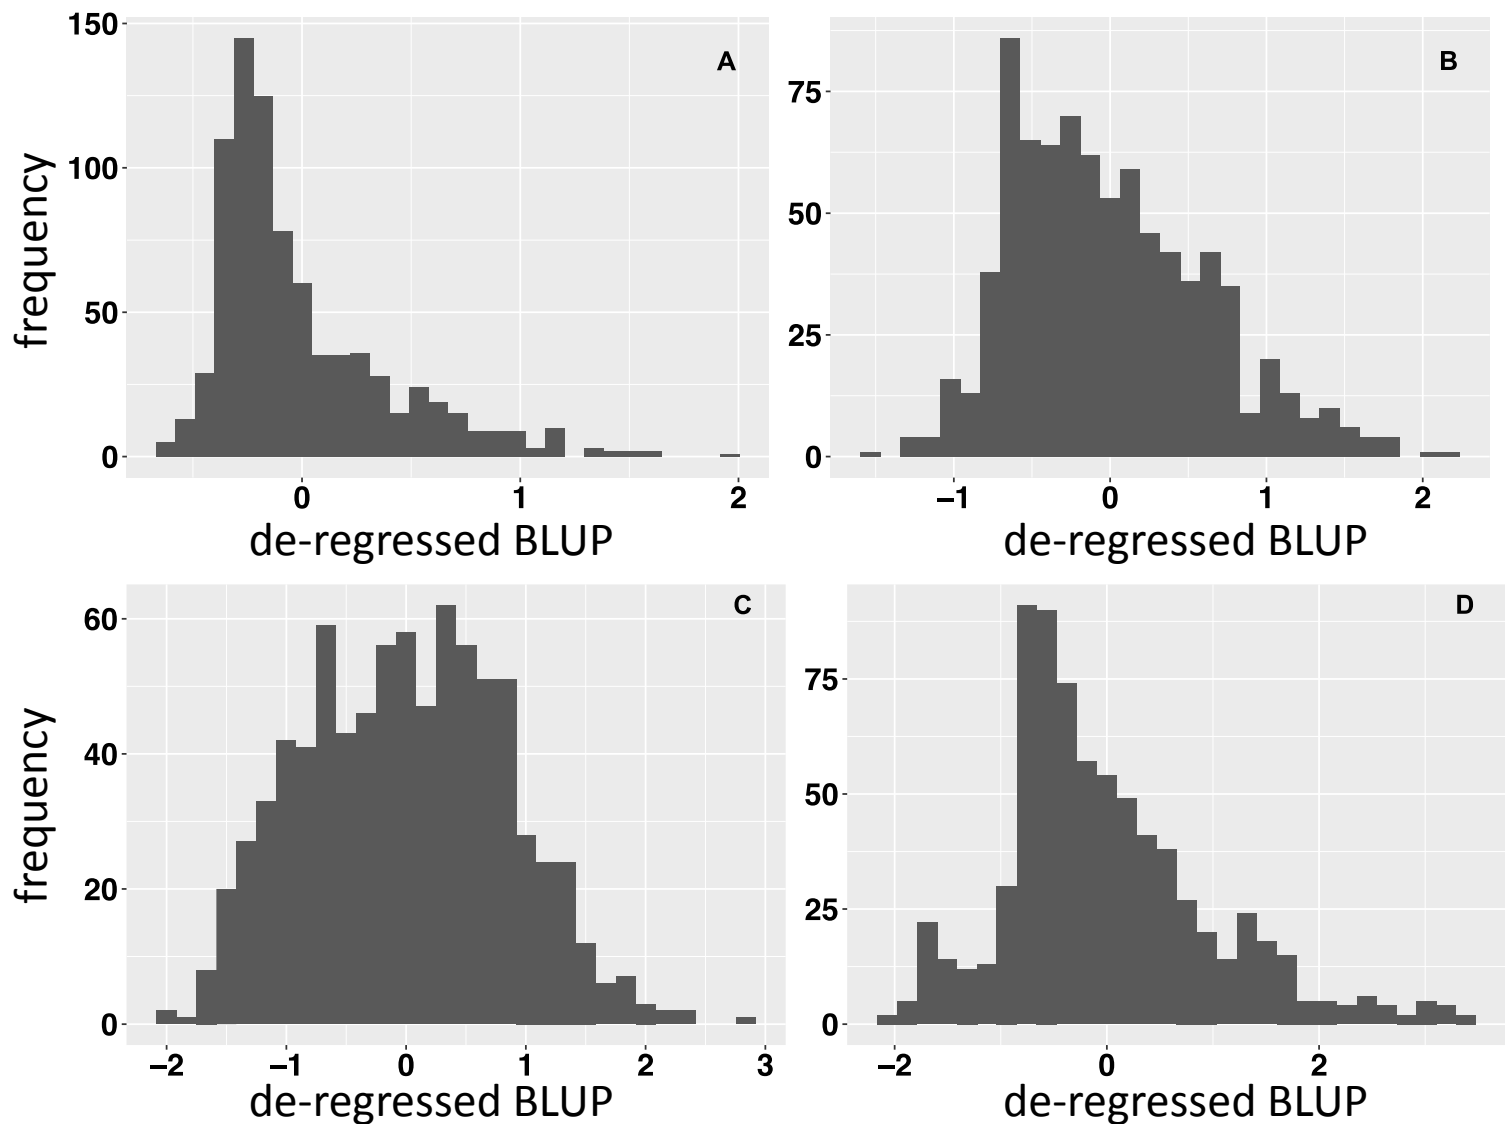

**Supplementary Figure S4. Correlation plots between de-regressed BLUPs for foliar and root symptoms.** Pairwise correlation plots of de-regressed BLUPs (x and y axes) measured in panel 1 at Namulonge (Nam), Ngetta (Nge) and Kasese (Kas) and in panel 2 at Nam, Kamuli (Kam) and Serere (Ser). De-regressed BLUPs were computed from CBSD symptom severity scores measured at 3 MAP ,6MAP , 9MAP and 12 months at harvest time (CBSDRS=root severity).MAP = months after planting, drBLUP = de-regressed BLUP.

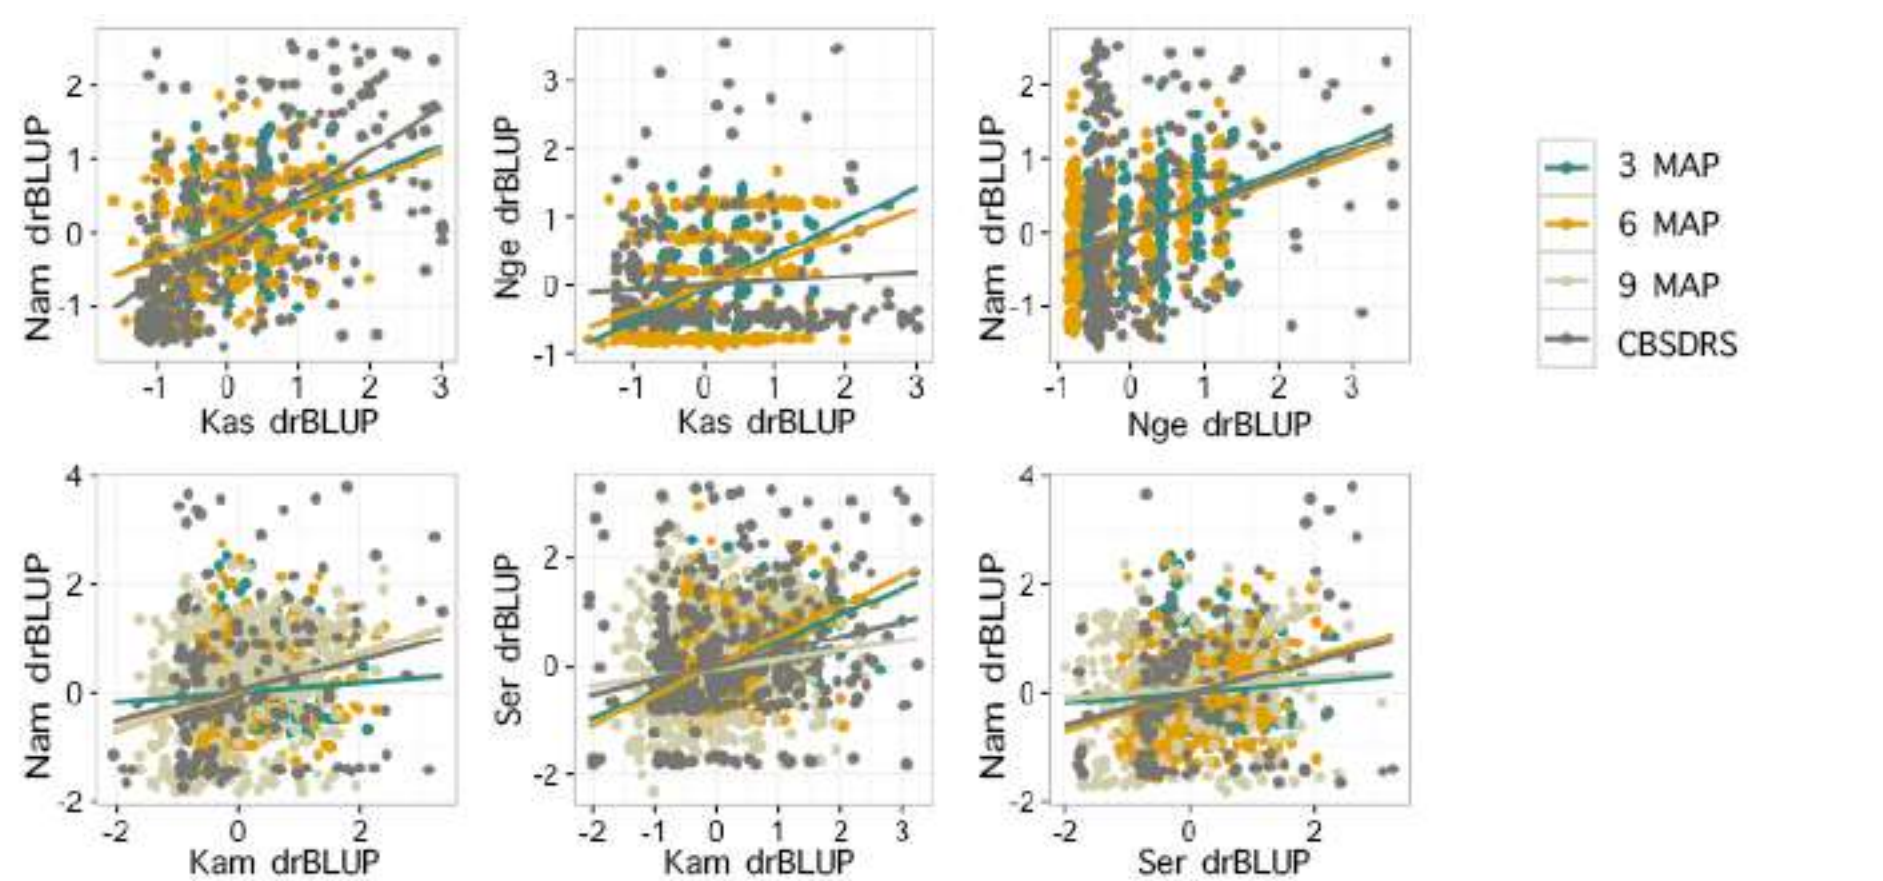

**Supplementary Figure S5: Manhattan plots for CBSD severity traits in Kasese – Panel1**

Association tests were performed for CBSD symptom severity on leaves at 3 and 6 month after planting (MAP) and on roots 12 MAP (CBSDRS). The horizontal line indicates the genome-wide significance level ( $-\log_{10}(\text{P-value}) = 5.9$ ).

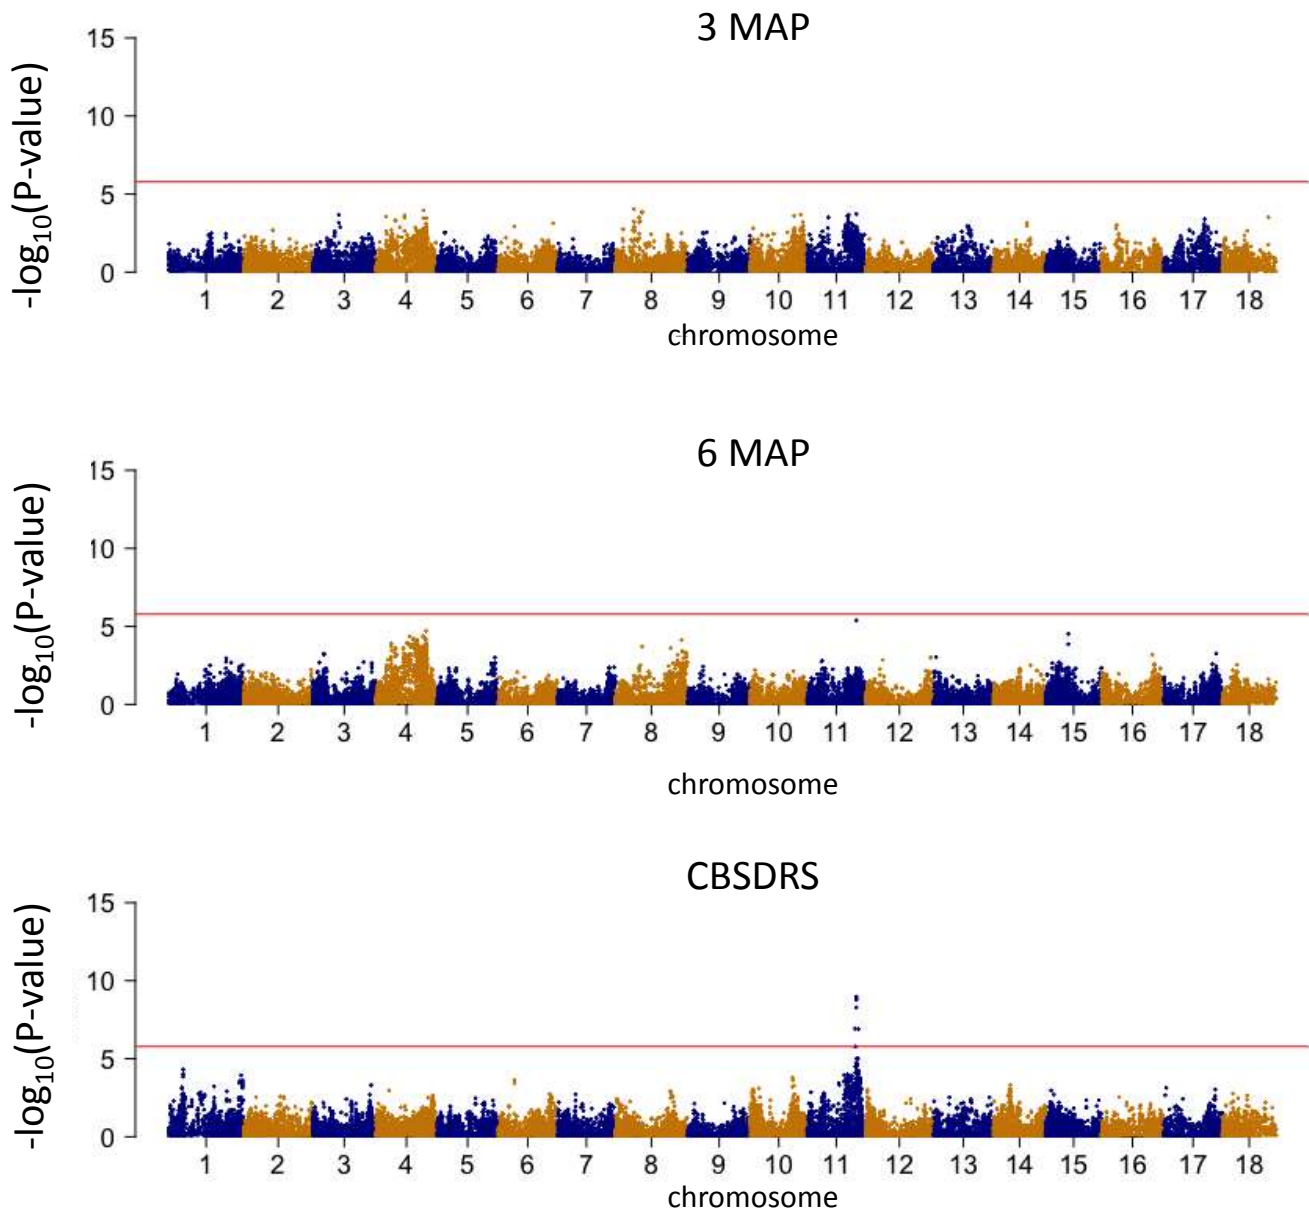

**Supplementary Figure S6: Manhattan plots for CBSD severity traits in Ngetta – Panel1.**

Association tests were performed for CBSD symptom severity on leaves at 3 and 6 month after planting (MAP) and on roots 12 MAP (CBSDRS). The horizontal line indicates the genome-wide significance level ( $-\log_{10}(\text{P-value}) = 5.9$ ).

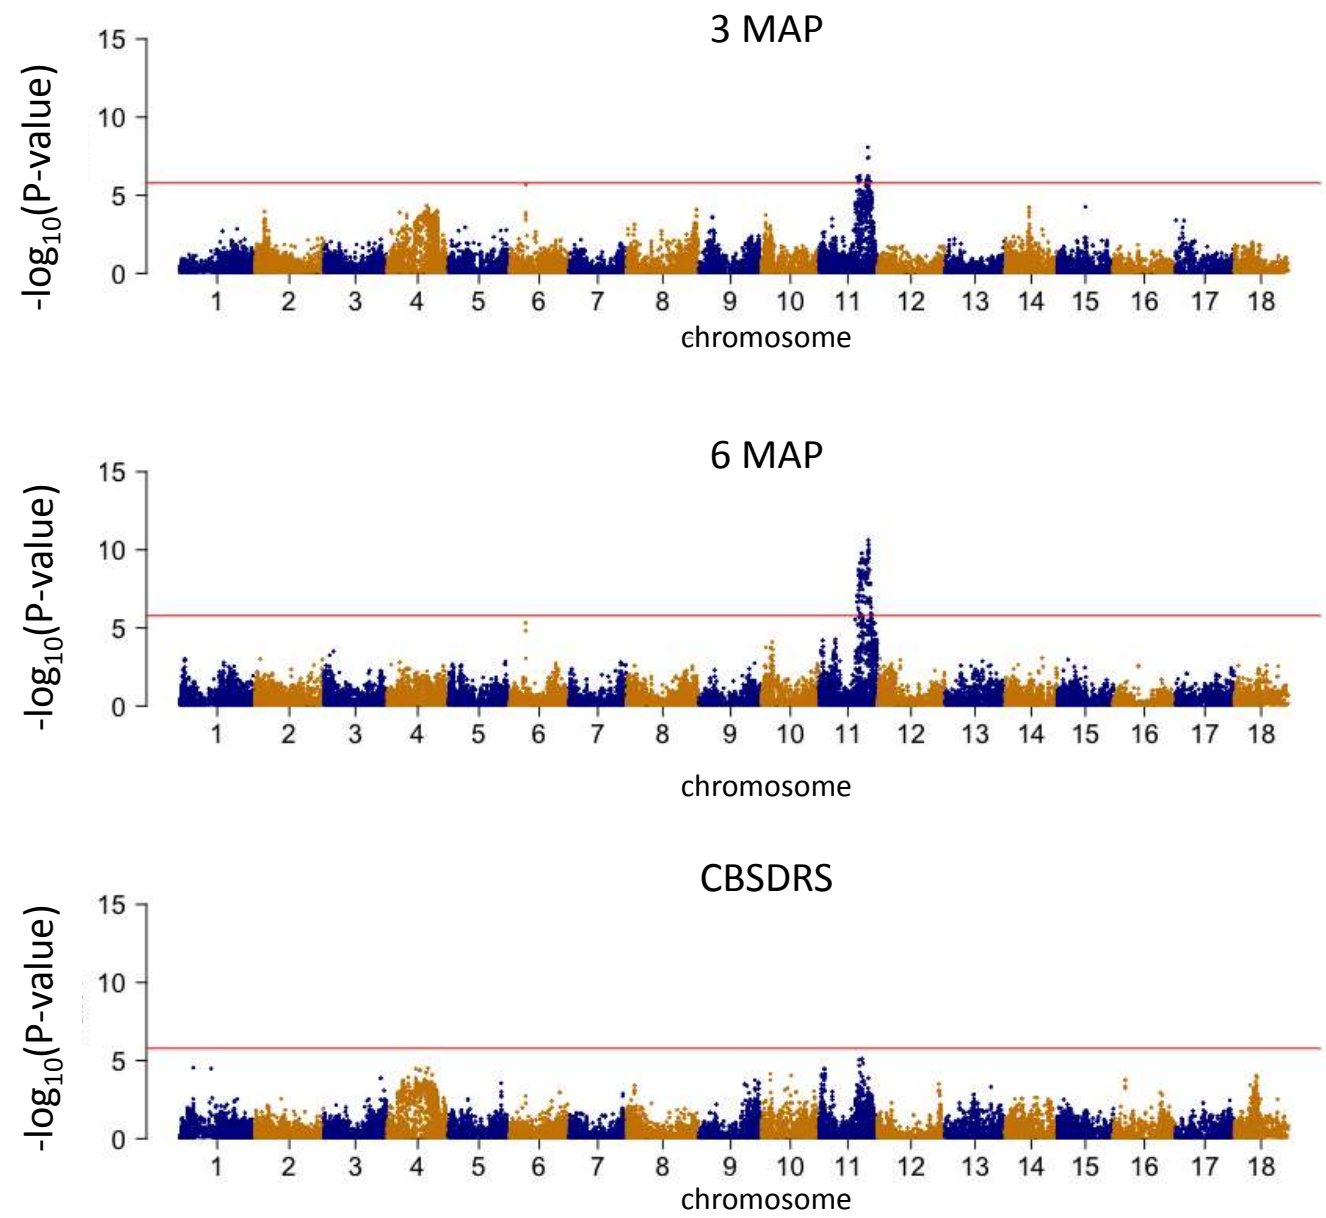

**Supplementary Figure S7: Manhattan plots for CBSD severity traits in Namulonge – Panel1.** Association tests were performed for CBSD symptom severity on leaves at 3 and 6 month after planting (MAP) and on roots 12 MAP (CBSDRS). The horizontal line indicates the genome-wide significance level ( $-\log_{10}(\text{P-value}) = 5.9$ ).

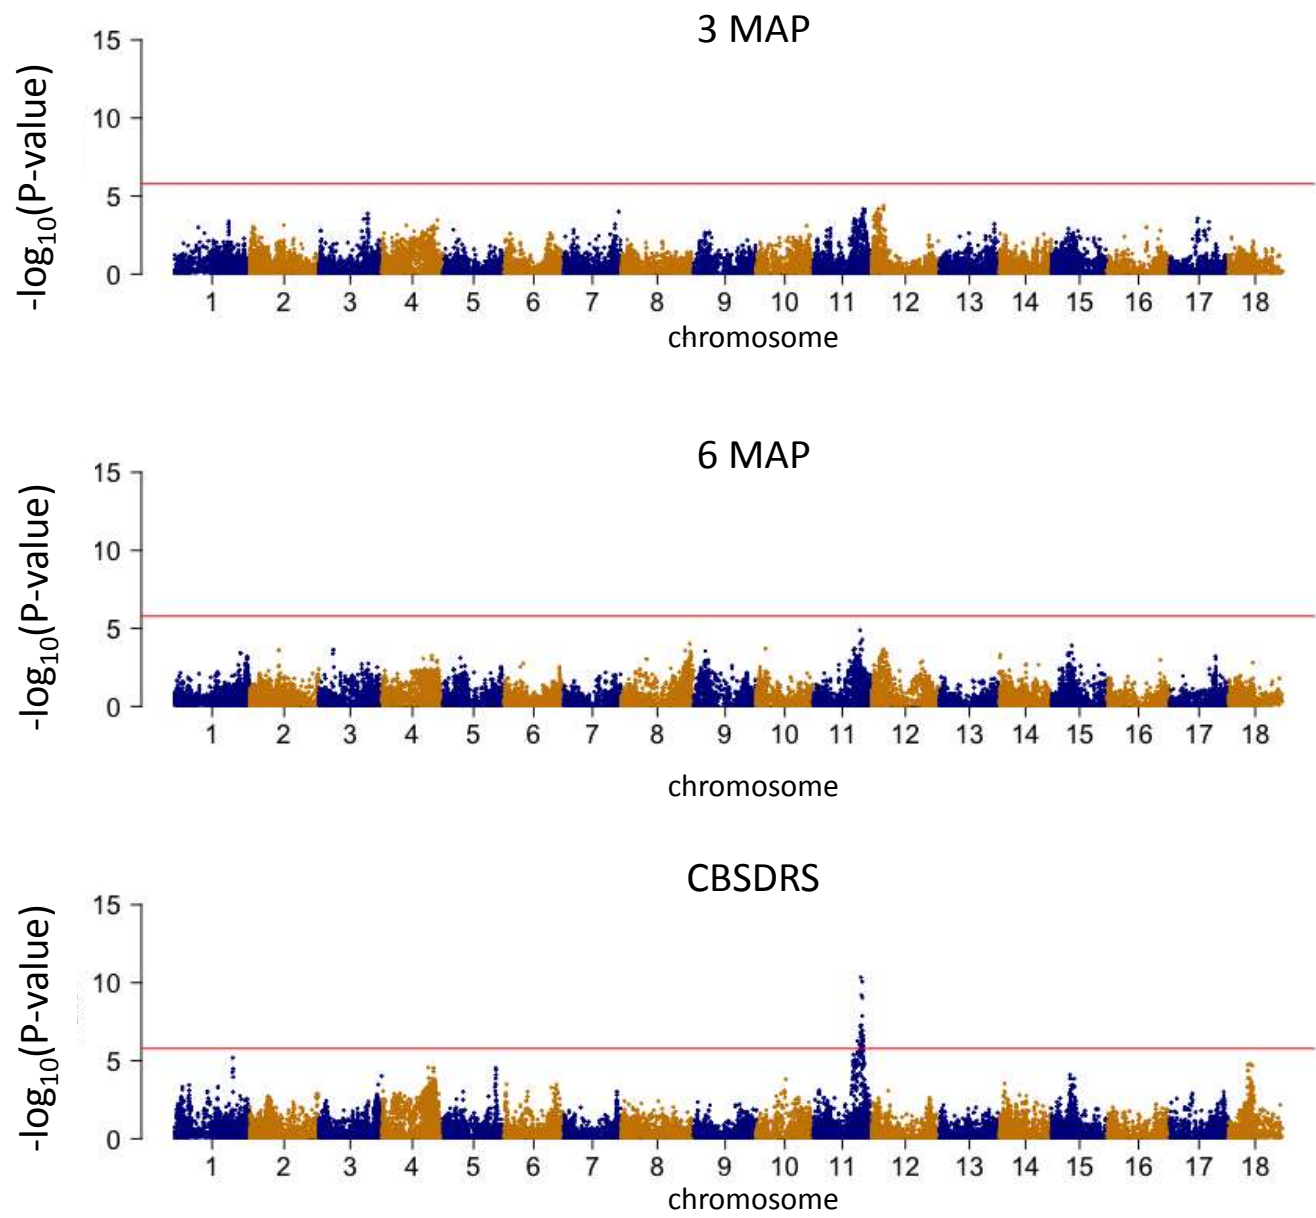

**Supplementary Figure S8: Manhattan plots for CBSD severity traits for Panel1 – Multi-locational dataset.** Association tests were performed for CBSD symptom severity on leaves at 3 and 6 month after planting (MAP) and on roots 12 MAP (CBSDRS). The horizontal line indicates the genome-wide significance level ( $-\log_{10}(P\text{-value}) = 5.9$ ).

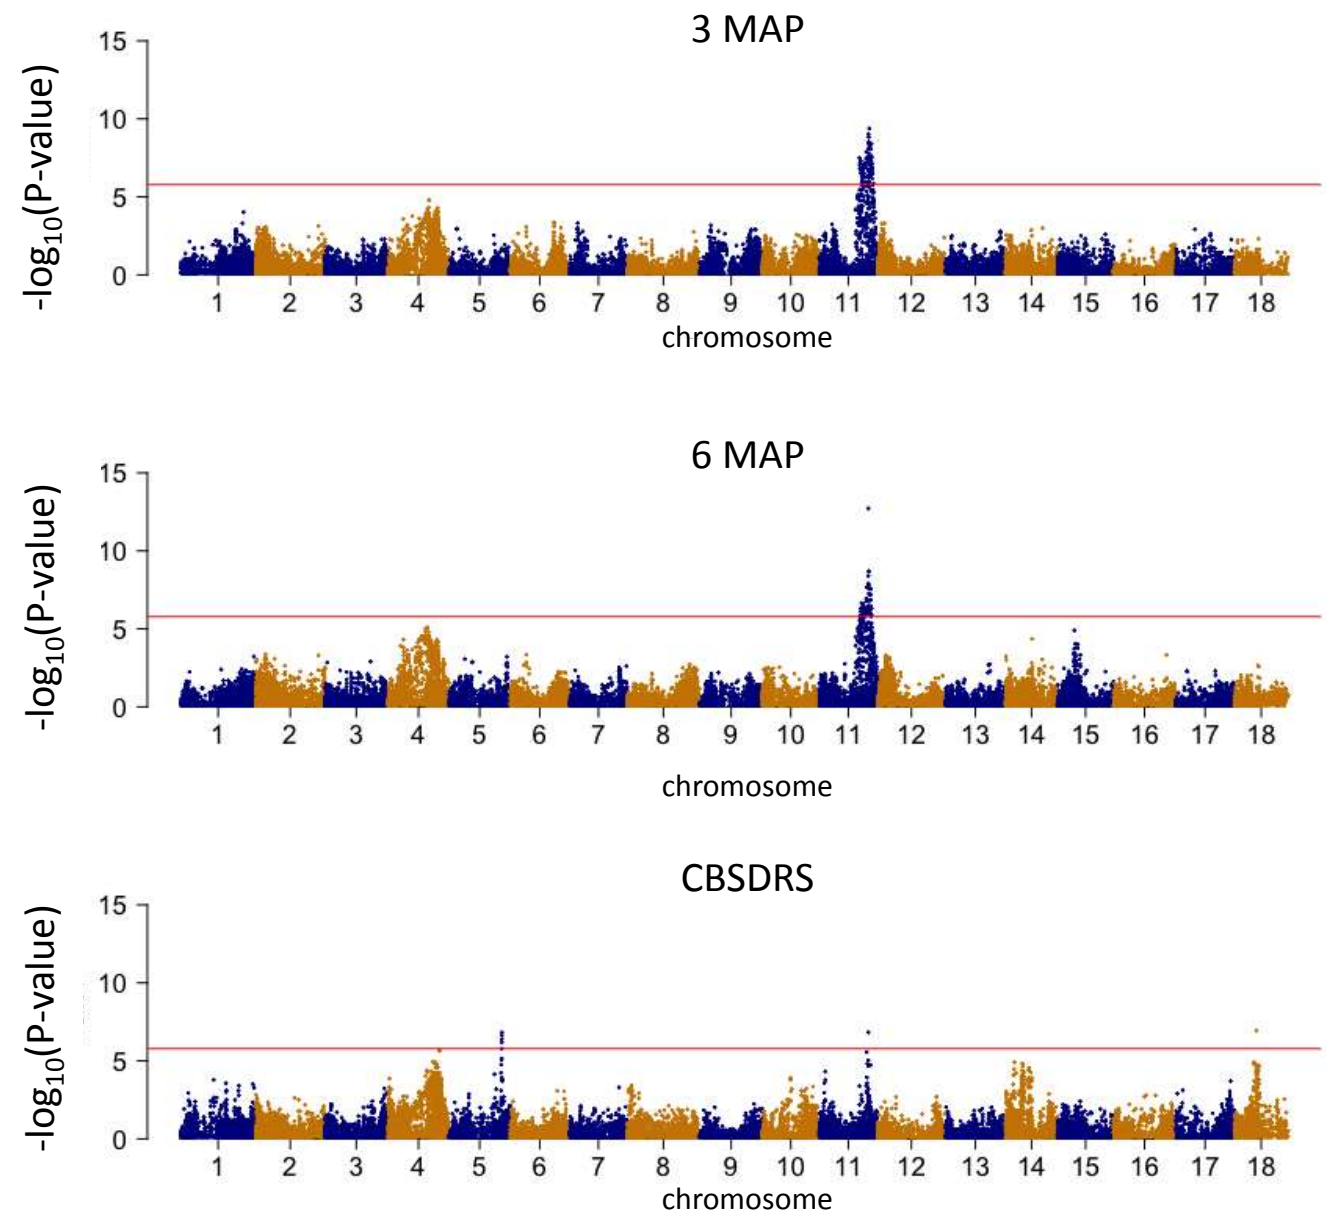

**Supplementary Figure S9: Manhattan plots for CBSD severity traits in Kamuli – Panel2.** Association tests were performed for CBSD symptom severity on leaves at 3 ,6 and 9 month after planting (MAP), and on roots 12 MAP (CBSDRS). The horizontal line indicates the genome-wide significance level ( $-\log_{10}(\text{P-value}) = 5.9$ ).

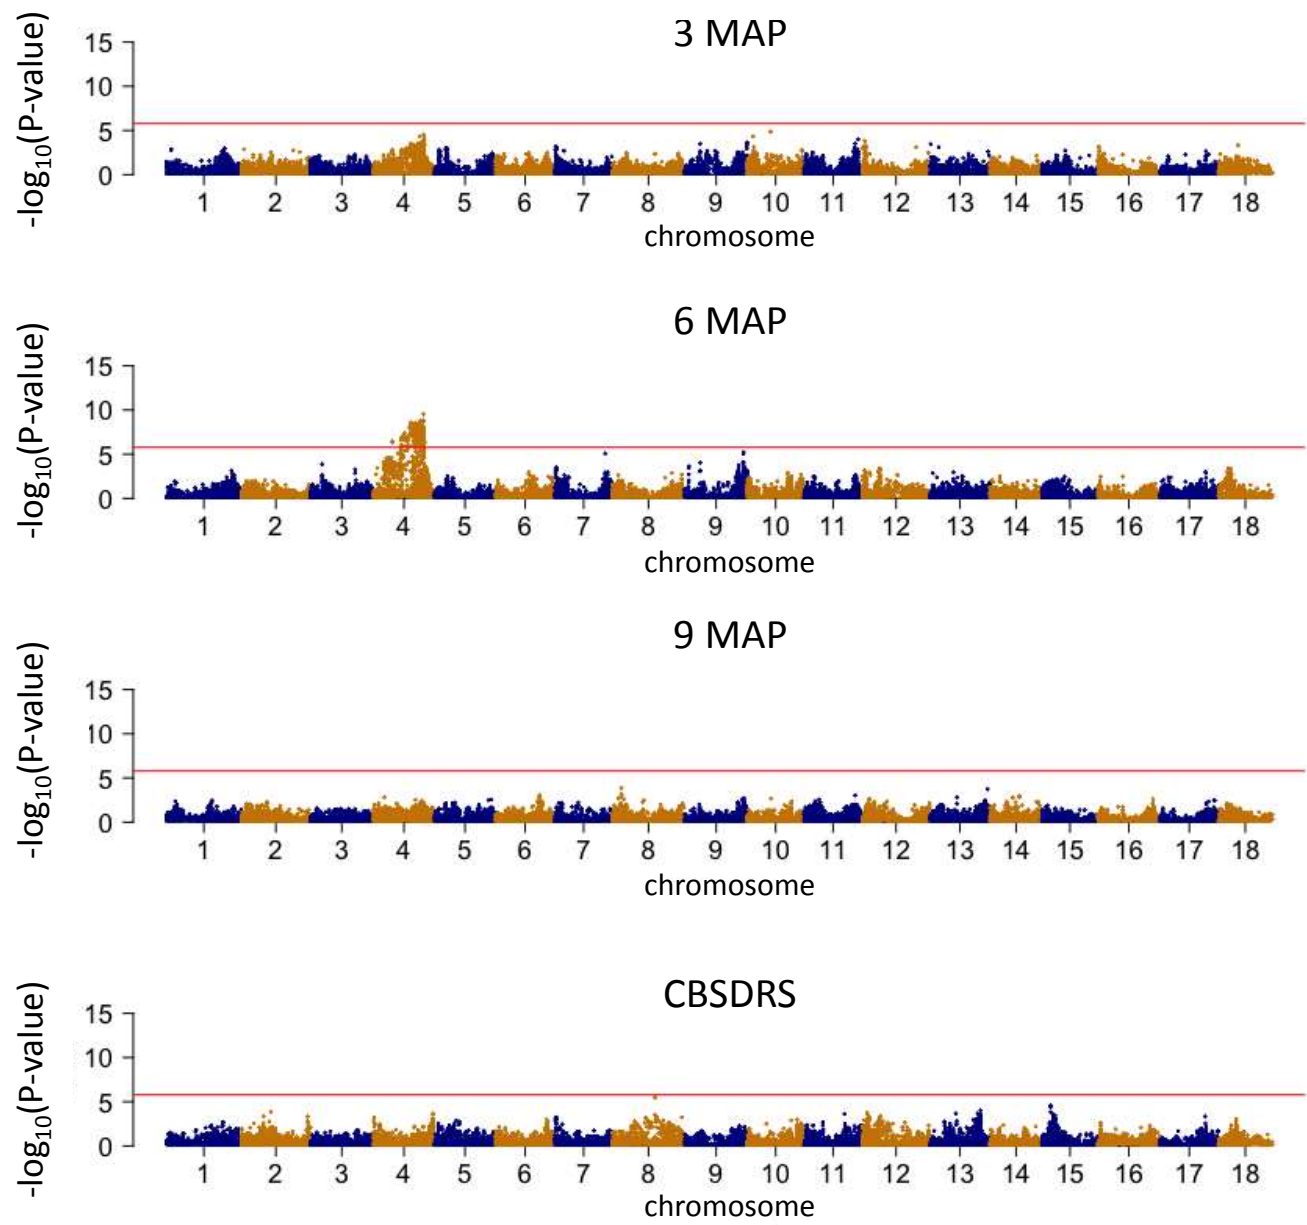

**Supplementary Figure S10: Manhattan plots for CBSD severity traits in Namulonge – Panel2.**

Association tests were performed for CBSD symptom severity on leaves at 3 ,6 and 9 month after planting (MAP), and on roots 12 MAP (CBSDRS). The horizontal line indicates the genome-wide significance level ( $-\log_{10}(\text{P-value}) = 5.9$ ).

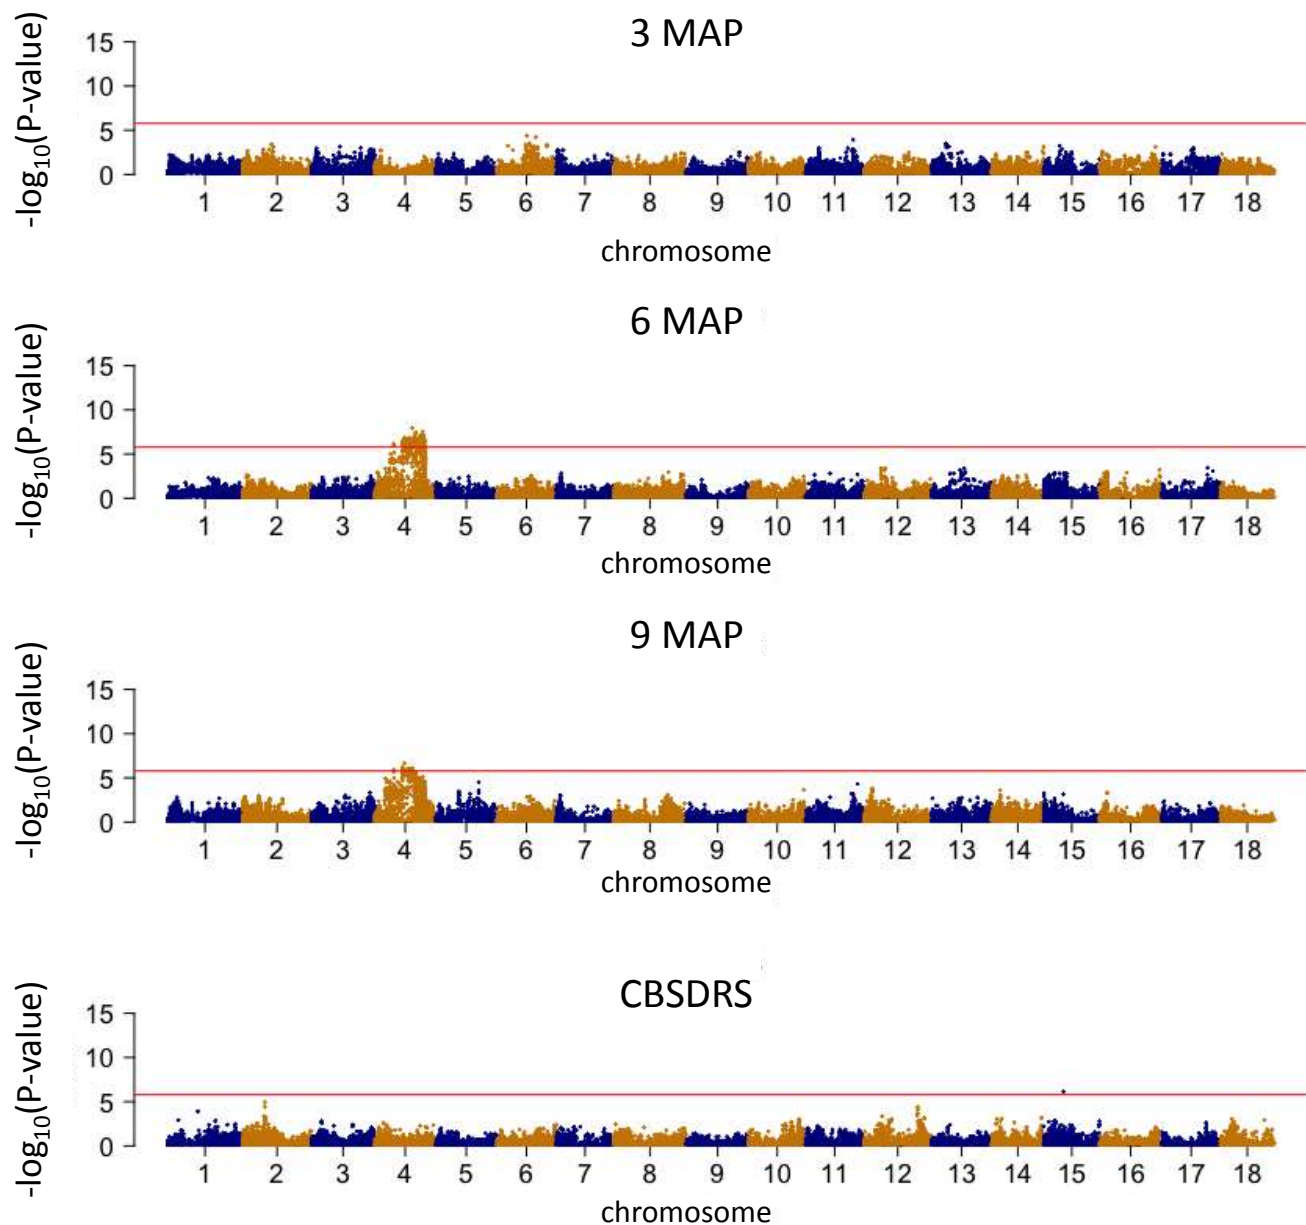

**Supplementary Figure S11: Manhattan plots for CBSD severity traits in Serere – Panel2.**

Association tests were performed for CBSD symptom severity on leaves at 3 ,6 and 9 month after planting (MAP), and on roots 12 MAP (CBSDRS). The horizontal line indicates the genome-wide significance level ( $-\log_{10}(\text{P-value}) = 5.9$ ).

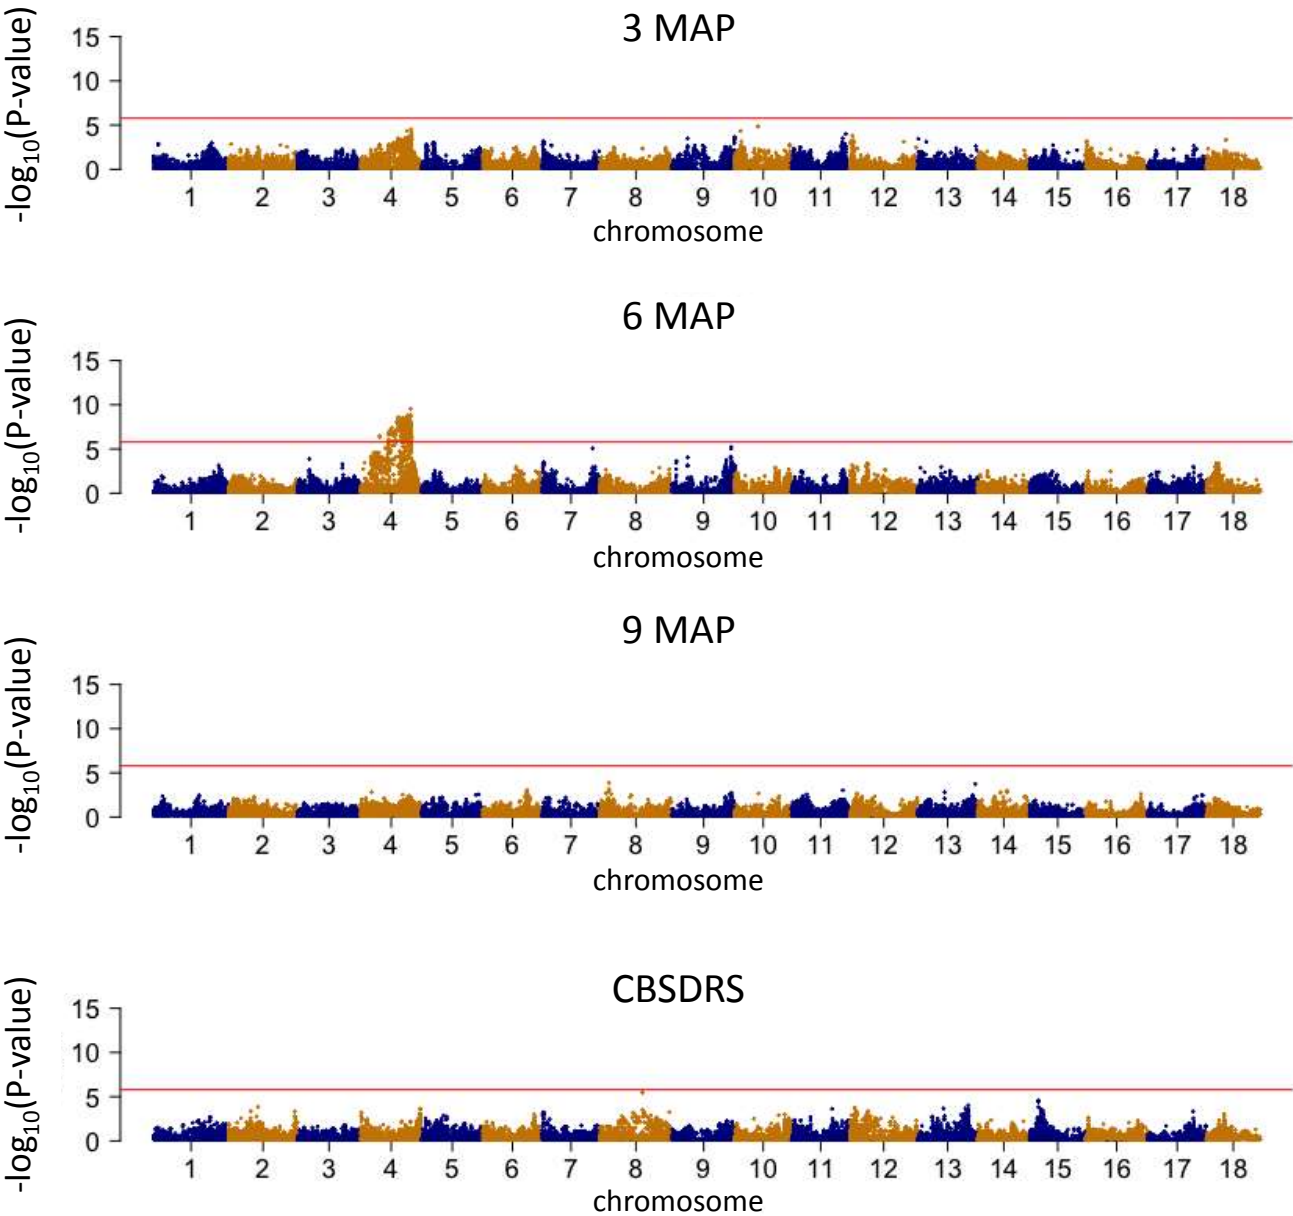

**Supplementary Figure 12: Manhattan plots for CBSD severity traits for Panel2 – Multi-location.**

Association tests were performed for CBSD symptom severity on leaves at 3, 6 and 9 month after planting (MAP), and on roots 12 MAP (CBSDRS). The horizontal line indicates the genome-wide significance level ( $-\log_{10}(\text{P-value}) = 5.9$ ).

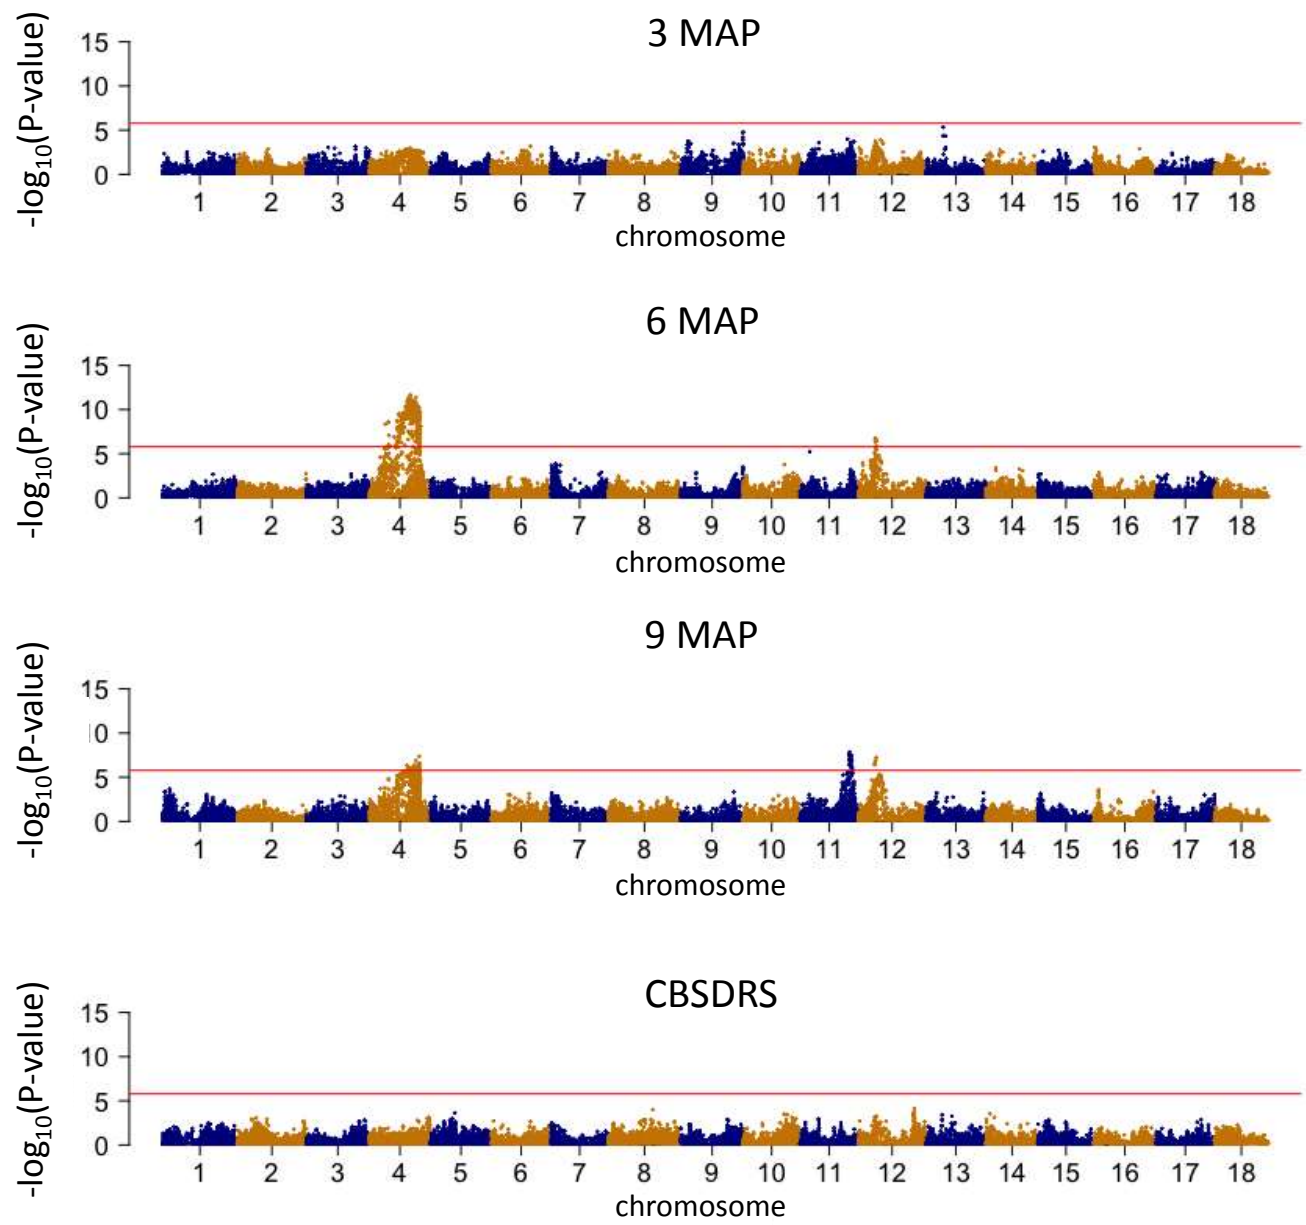



**Supplementary Figure S14.** GWAS results for 6MAP CBSD severity combined panels multilocalational dataset. **(a)** GWAS results for 6MAP CBSD symptom severity without CMD correction **(b)** GWAS results using CMD scoring correction in the calculation of the de-regressed BLUPs.

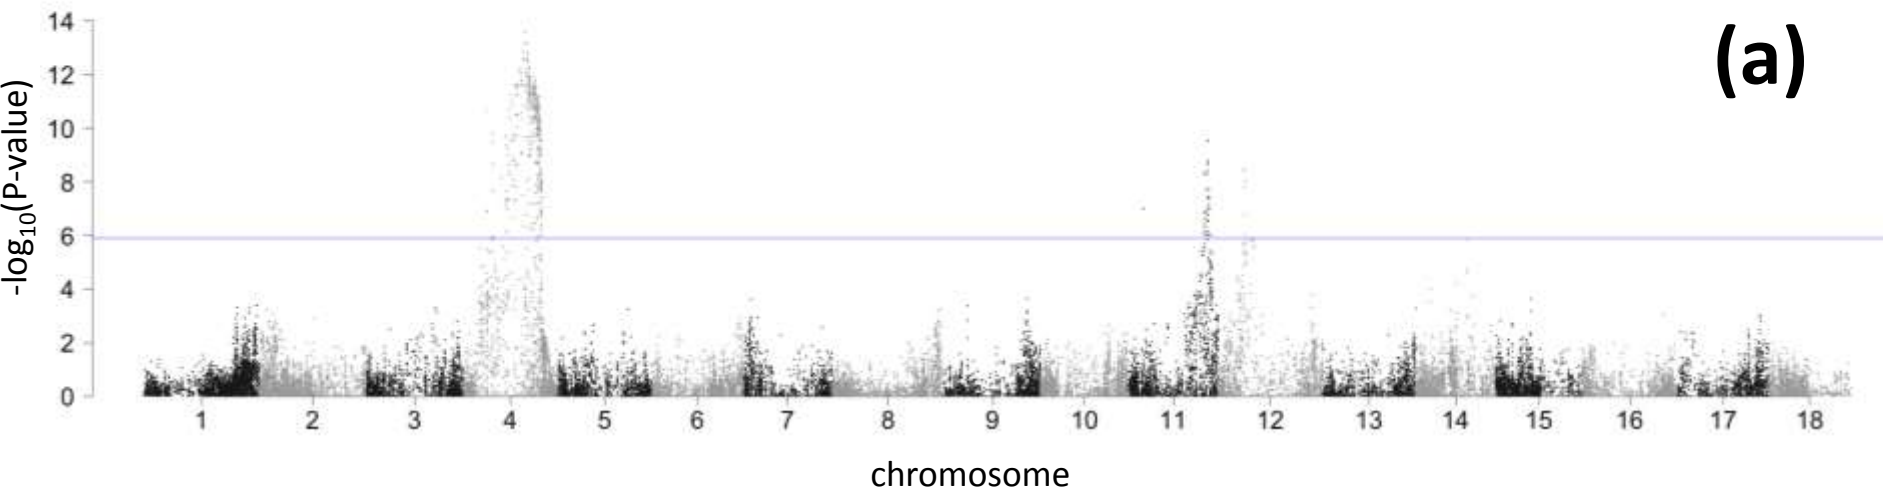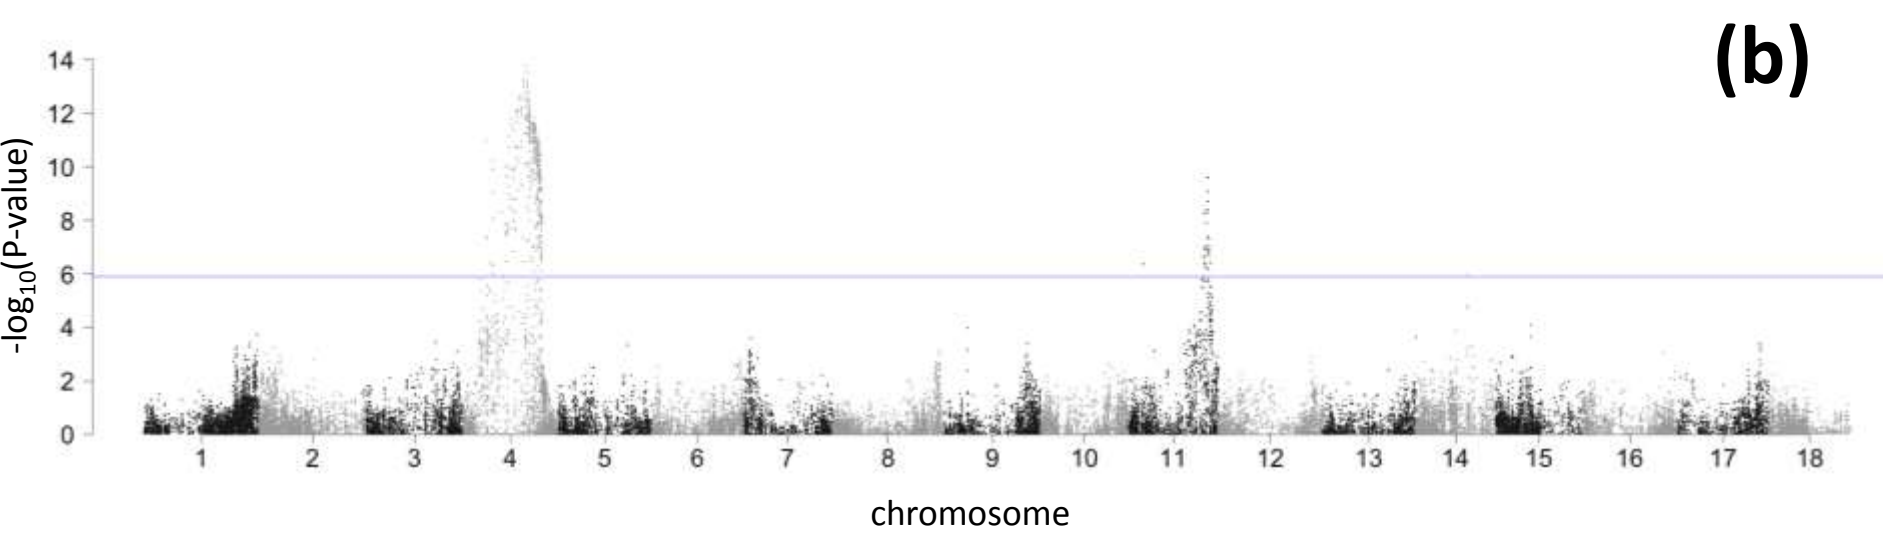

**Supplementary Figure S15. Cross validation accuracies of the Multi-kernel GBLUP approach compared to the single kernel GBLUP.** GS predictive accuracies results for CBSD severity were calculated using the combined panels multilocal dataset. Cross validation results are shown for CBSD 3 MAP(CBSD3S),CBSD 6 MAP (CBSD6S) and root necrosis severity (CBSDRS).MAP= months after planting. Cross validation accuracies per kernel are presented : Chr 4 = chromosome 4, Chr 11 = chromosome 11 and RestGeno= other chromosomes (minus 4 and 11). TotalAcc = total predictive accuracy of the multikernel GBLUP, GBLUP= single kernel GBLUP.

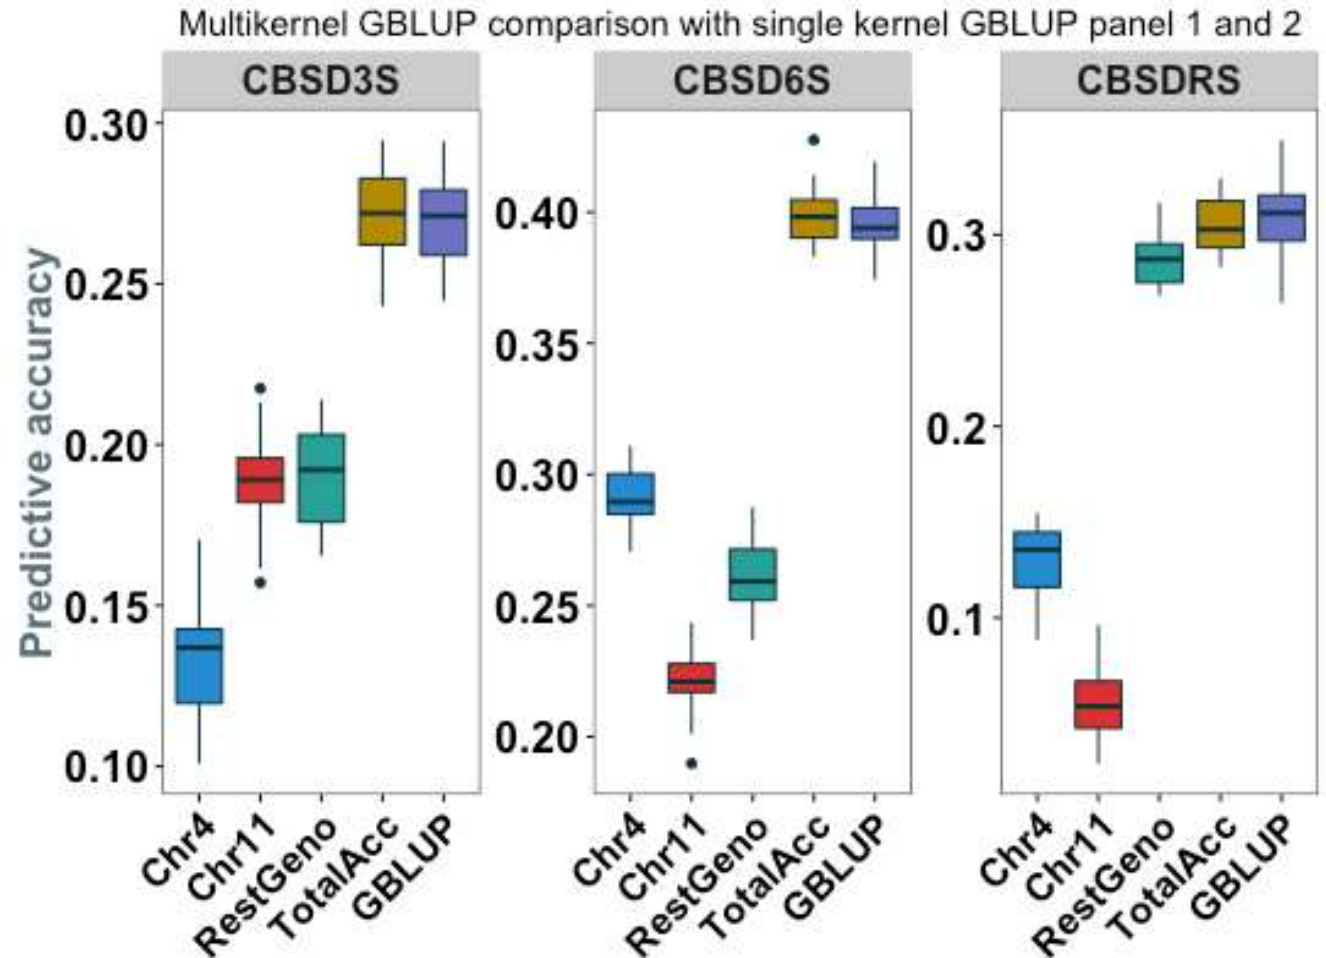

Supplement: Supplementary file 1 — Supplementary Figures [file 41598_2018_19696_MOESM1_ESM.pdf]
